# Supplementary material for: Effects of Dietary Supplementation of Oregano Essential Oil to Sows on Oxidative Stress Status, Lactation Feed Intake of Sows, and Piglet Performance
Source: Hindawi journal article supplement (doi:10.1155/2015/525218), 2015-01-01
Supplement: f1 [file 525218.f1.pdf]

## 1 **Supplementary Information**

### 2 **MATERIALS AND METHODS**

#### 3 **Chemicals**

4 The composition of OEO were analyzed in the laboratory using Hewlett-Packard 6890  
5 gas chromatograph equipped with a cross-linked 5% PH ME siloxane  
6 Hewlett-Packard-5MS capillary column (25m × 0.25mm ID, 0.25  $\mu$  m film thickness),  
7 coupled to a Hewlett-Packard 5972A mass spectrometer (Hewlett Packard Ltd.,  
8 Bracknell, UK). Relative percentage amounts were obtained directly from GC peak  
9 areas. The absolute concentration of carvacrol was determined by gas  
10 chromatography using external standard method. The GC operating conditions were  
11 the same as above. The absolute concentrations of other ingredients were calculated  
12 based on the relative percentage amounts (Table S1).

13

14 **Table S1.** Components of the oregano essential oil

| Chemical constituents               | Percentage | Absolute concentration (mg/ml) |
|-------------------------------------|------------|--------------------------------|
| $\alpha$ -Thujene/ $\alpha$ -pinene | 0.66       | 0.29                           |
| Camphene                            | 0.09       | 0.04                           |
| $\beta$ -Pinene                     | 0.07       | 0.03                           |
| Sabinene                            | 0.04       | 0.02                           |

---

|                                    |      |       |
|------------------------------------|------|-------|
| Myrcene                            | 0.86 | 0.38  |
| $\alpha$ -Phellandrene             | 0.08 | 0.04  |
| $\alpha$ -Terpinene                | 0.58 | 0.25  |
| Limonene                           | 0.13 | 0.06  |
| 1,8-Cineole+ $\beta$ -phellandrene | 0.09 | 0.04  |
| $\beta$ -Ocimene                   | 0.07 | 0.03  |
| $\gamma$ -Terpinene                | 4.49 | 1.97  |
| 3-Octanone                         | 0.07 | 0.03  |
| p-Cymene                           | 3.07 | 1.35  |
| Terpinolene                        | 0.04 | 0.02  |
| 3-Octanel                          | 0.01 | <0.01 |
| 1-Octen-3-ol                       | 0.24 | 0.11  |
| Dimethyl styrene                   | 0.01 | 0.00  |
| Trans-sabinene hydrate             | 0.10 | 0.04  |
| Linalool                           | 0.28 | 0.12  |
| Cis-sabinene hydrate               | 0.06 | 0.03  |
| 1-Terpilool                        | 0.04 | 0.02  |
| Terpine-4-ol                       | 0.34 | 0.15  |
| Carvacrol methyl ether             | 0.22 | 0.10  |
| $\beta$ -Caryophyllene             | 1.41 | 0.62  |
| Dihydrocarvone                     | 0.08 | 0.04  |
| $\alpha$ -Humulene                 | 0.14 | 0.06  |
| $\alpha$ -Terpineol                | 0.16 | 0.07  |
| Bomeol                             | 0.30 | 0.13  |

---

---

|                     |       |       |
|---------------------|-------|-------|
| $\beta$ -Bisabolene | 0.70  | 0.31  |
| Caryophyllene oxide | 0.14  | 0.06  |
| Thymol              | 3.50  | 1.54  |
| Carvacrol           | 81.92 | 36.01 |
| Total               | 99.99 |       |

---
